# Supplementary material for: Genetically modified crops are superior in their nitrogen use efficiency-A meta-analysis of three major cereals
Source: PubMed Central journal article supplement (PMC7244766; doi:10.1038/s41598-020-65684-9), 2020-05-22
Supplement: 41598_2020_65684_MOESM3_ESM.pdf [file 41598_2020_65684_MOESM3_ESM.pdf]

## **Genetically modified crops are superior in their nitrogen use efficiency-A meta-analysis of three major cereals**

Mengjiao Li <sup>1</sup>, Jili Xu <sup>1</sup>, Zhiyuan Gao <sup>1</sup>, Hui Tian <sup>1,\*</sup>, Yajun Gao <sup>1,\*</sup> & Khalil Kariman<sup>2</sup>

<sup>1</sup> Key Laboratory of Plant Nutrition and Agri-environment in Northwest China, Ministry of Agriculture, College of Natural Resources and Environment, Northwest A&F University, Yangling, Shaanxi, China

<sup>2</sup> School of Agriculture and Environment, The University of Western Australia, Crawley, WA 6009, Australia

Corresponding authors:

1. Hui Tian, tianh@nwsuaf.edu.cn
2. Yajun Gao, yajungao@nwafu.edu.cn

**Supplementary Table 7.** Gene categories involved in the collected studies

| <b>Gene name</b>     | <b>Description</b>                                                                                                                                               | <b>Category</b>                             |
|----------------------|------------------------------------------------------------------------------------------------------------------------------------------------------------------|---------------------------------------------|
| <i>Bt</i>            | Bt protein                                                                                                                                                       | <b>Biotic-stress related Protein (BSRP)</b> |
| <i>Bar</i>           | Herbicide resistance gene                                                                                                                                        |                                             |
| <i>BjNPR1</i>        | Pathogenesis-related genes 1                                                                                                                                     |                                             |
| <i>PcGDH</i>         | Fungi NADP(H)-dependent GDH                                                                                                                                      |                                             |
| <i>ZmPti1-1</i>      | Serine/threonine kinase<br>The enzyme that mobilizes photoassimilated sucrose into numerous reactions of the developing plant seeds, associated with grain yield |                                             |
| <i>Incw2</i>         | DEAD-box helicase                                                                                                                                                |                                             |
| <i>PDH45</i>         | Sucrose non-fermenting 1-related kinase                                                                                                                          |                                             |
| <i>SAPK9</i>         | Phosphoenolpyruvate carboxylase                                                                                                                                  |                                             |
| <i>PEPC/PPDK</i>     | Phytase                                                                                                                                                          |                                             |
| <i>appA</i>          | Vacuolar H <sup>+</sup> -pyrophosphatase                                                                                                                         |                                             |
| <i>AVP1</i>          | Phospholipase D                                                                                                                                                  |                                             |
| <i>PLD</i>           | V-H <sup>+</sup> Ppase                                                                                                                                           |                                             |
| <i>VP</i>            | Leucine-rich repeat receptor-like kinase                                                                                                                         |                                             |
| <i>LRK1</i>          | Gibberellin 2-oxidase                                                                                                                                            |                                             |
| <i>AtGA2ox8</i>      | S-domain receptor-like kinase extracellular domain, involved in the self-incompatibility response                                                                |                                             |
| <i>SRK</i>           | Alanine amino transferase                                                                                                                                        |                                             |
| <i>AlaAt</i>         | Asparagine synthetase                                                                                                                                            |                                             |
| <i>ASN</i>           | Cytosolic glutamine synthetase isoenzymes                                                                                                                        |                                             |
| <i>GSI</i>           | CBL-Interacting Kinase                                                                                                                                           |                                             |
| <i>ZmCIPK21</i>      | Glyceral-Dehyde-3-phosphate dehydrogenase                                                                                                                        |                                             |
| <i>PsGPD</i>         | Sucrose on-fermenting-1-related protein kinase                                                                                                                   |                                             |
| <i>SnRK</i>          | Mitochondrial malate dehydrogenase                                                                                                                               |                                             |
| <i>MDH</i>           | GA biosynthesis                                                                                                                                                  |                                             |
| <i>GA20-OXIDASE1</i> | Arabidopsis vacuolar H <sup>+</sup> -pyrophosphatase                                                                                                             |                                             |
| <i>AVP1</i>          | Trehalose-6-phosphate phosphatase                                                                                                                                |                                             |
| <i>TPP</i>           | Vacuolar H <sup>+</sup> -pyrophosphatase                                                                                                                         |                                             |
| <i>TsVP</i>          | Gamma-glutamylcysteine                                                                                                                                           |                                             |

---

|                                               |                                                                                          |                           |
|-----------------------------------------------|------------------------------------------------------------------------------------------|---------------------------|
|                                               | synthetase                                                                               |                           |
| <i>LOS5</i>                                   | Molybdenum cofactor sulfurase                                                            |                           |
| <i>Cu/Zn-SOD+APX</i>                          | Superoxide dismutase/ascorbate peroxidase                                                |                           |
|                                               | A                                                                                        |                           |
|                                               | vacuolar H <sup>+</sup>                                                                  |                           |
| <i>SaVHAC1</i>                                | -ATPase subunit c1 gene from the halophyte grass <i>Spartina alterniflora</i> Loisel     |                           |
| <i>SARK9</i>                                  | Sucrose non-fermenting 1-related kinase 2 gene                                           |                           |
| <i>OsACS2</i>                                 | 1-aminocyclopropane-1-carboxylic acid synthase                                           |                           |
| <i>OsCPK4</i>                                 | Calcium-dependent protein kinase                                                         |                           |
| <i>OsHsFA2D</i>                               | Heat Shock transcription factor                                                          |                           |
| <i>TsCBF1</i>                                 | C-repeat-binding transcription factor                                                    |                           |
| <i>NAC5, 6, 9, 67, 69</i>                     | NAC transcription factor                                                                 |                           |
| <i>AP37, 59</i>                               | Transcription factor                                                                     |                           |
| <i>ZmDOF1</i>                                 | DOF transcription factor                                                                 |                           |
| <i>OsMYB55</i>                                | MYB transcription factor                                                                 |                           |
| <i>CCAAT Box-Binding Transcription Factor</i> | CCAAT Box-Binding transcription Factor                                                   | Transcription factor (TF) |
| <i>OsPTF1</i>                                 | Transcription factor                                                                     |                           |
|                                               | Encodes a member of the DREB subfamily A-1 of ERF/AP2 transcription factor family (CBF3) |                           |
| <i>DHHC-type</i>                              | DHHC-type zinc finger protein                                                            |                           |
| <i>Ossta2</i>                                 | Oryza sativa salt tolerance activation 2-Dominant                                        |                           |
| <i>W16</i>                                    | AP2/EREBP transcription factor                                                           |                           |
| <i>DHHC</i>                                   | Zinc-finger protein                                                                      |                           |
| <i>OsHAK1</i>                                 | High-affinity potassium transporter                                                      |                           |
| <i>NAT3</i>                                   | A nitrate transporter of <i>cylindrotheca fusiformis</i>                                 |                           |
| <i>OsPTR6</i>                                 | Nitrate transporter                                                                      |                           |
| <i>STP13</i>                                  | Hexose transporter                                                                       | Transporter               |
| <i>ApKUP3</i>                                 | High-affinity potassium transporters                                                     |                           |
| <i>PHO1</i>                                   | Pi transporter                                                                           |                           |
| <i>PgNHX1</i>                                 | <i>Pennisetum glaucum</i> vacuolar Na <sup>+</sup> /H <sup>+</sup> antiporter gene       |                           |

---

|                                                                         |                                                                                     |             |
|-------------------------------------------------------------------------|-------------------------------------------------------------------------------------|-------------|
| <i>nhaA</i>                                                             | Na <sup>+</sup> /H <sup>+</sup> antiporter                                          |             |
| <i>HvSUT1</i>                                                           | Sucrose transporter                                                                 |             |
| <i>OsNRT2.3b/OsNPF7.3/OsNRT1.1A.OsNPF6.3/OsNRT2.1/OsNPF7.9/OsNRT1.2</i> | Nitrate transporter                                                                 |             |
| <i>OsAMT1-1</i>                                                         | Ammonium transporter                                                                |             |
| <i>HVA1</i>                                                             | Late embryogenesis abundant protein                                                 |             |
| <i>AISAP</i>                                                            | Stress associated protein                                                           |             |
| <i>OsEOD93-1</i>                                                        | Nitrogen-responsive early nodulin gene                                              |             |
| <i>Tin</i>                                                              | Tiller inhibition gene                                                              |             |
| <i>OCP11</i>                                                            | Stress responsive proteinase inhibitor gene                                         |             |
| <i>Bn-csRRM2</i>                                                        | A conserved RNA-binding motif (RRM) domain, flowering control locus A (FCA) protein |             |
| <i>TaPHR1</i>                                                           | A phosphate starvation response regulator                                           |             |
| <i>LEA</i>                                                              | Late embryogenesis abundant                                                         |             |
| <i>SeCspA</i>                                                           | Synthetic bacterial cold shock protein gene                                         |             |
| <i>TOND1</i>                                                            | Tolerance of nitrogen deficiency                                                    |             |
| <i>OsPIN2</i>                                                           | Efflux-facilitating PIN-FORMED                                                      |             |
| <i>TaMIR1129</i>                                                        | miRNA                                                                               | Other genes |
| <i>OsDhn1</i>                                                           | Dehydrin gene                                                                       |             |
| <i>OsCam1-1</i>                                                         | Salt-inducible calmodulin gene                                                      |             |
| <i>RAA1</i>                                                             | Root architecture associated 1                                                      |             |
| <i>MoSM1</i>                                                            | Immunity-inducing protein                                                           |             |
| <i>SaARF1</i>                                                           | ADP ribosylation factor                                                             |             |
| <i>RPL23A</i>                                                           | Ribosomal protein large                                                             |             |
| <i>PgRab7</i>                                                           | Vesicle trafficking protein                                                         |             |
| <i>AtGRP2</i>                                                           | Glycine-rich RNA-binding protein                                                    |             |
| <i>SeCspA</i>                                                           | Synthetic bacterial cold shock protein                                              |             |
| <i>U</i>                                                                | Unknown genes                                                                       |             |
| <i>EhEMI</i>                                                            | Em-like protein from Eutrema halophilum                                             |             |
| <i>OsENOD93-1</i>                                                       | A nitrogen-responsive early nodulin                                                 |             |

---

|                |                                                  |
|----------------|--------------------------------------------------|
| <i>OsPGIP1</i> | gene<br>Polygalacturonase-inhibiting<br>proteins |
|----------------|--------------------------------------------------|

---
