# Supplementary material for: Genetically modified crops are superior in their nitrogen use efficiency-A meta-analysis of three major cereals
Source: PubMed Central journal article supplement (PMC7244766; doi:10.1038/s41598-020-65684-9), 2020-05-22
Supplement: 41598_2020_65684_MOESM4_ESM.pdf [file 41598_2020_65684_MOESM4_ESM.pdf]

## **Genetically modified crops are superior in their nitrogen use efficiency-A meta-analysis of three major cereals**

Mengjiao Li <sup>1</sup>, Jili Xu <sup>1</sup>, Zhiyuan Gao <sup>1</sup>, Hui Tian <sup>1,\*</sup>, Yajun Gao <sup>1,\*</sup> & Khalil Kariman<sup>2</sup>

<sup>1</sup> Key Laboratory of Plant Nutrition and Agri-environment in Northwest China, Ministry of Agriculture, College of Natural Resources and Environment, Northwest A&F University, Yangling, Shaanxi, China

<sup>2</sup> School of Agriculture and Environment, The University of Western Australia, Crawley, WA 6009, Australia

Corresponding authors:

1. Hui Tian, tianh@nwsuaf.edu.cn
2. Yajun Gao, yajungao@nwafu.edu.cn

**Supplementary Table 8.** Summary of results from the meta-analyses on yield, shoot biomass, shoot N utilization efficiency (SNUE), N uptake efficiency (NUpE), grain N utilization efficiency (GNUE), and partial factor productivity of N (PFPN) by using the complete dataset and by using one random observation per study.

| Parameters    | Dataset                          | <i>n</i> | Log <sub>e</sub> <i>R</i> (%) | 95% CI  |         | <i>P</i> |
|---------------|----------------------------------|----------|-------------------------------|---------|---------|----------|
|               |                                  |          |                               | Min.    | Max.    |          |
| Yield         | Complete dataset                 | 870      | 0.1546                        | 0.1289  | 0.1804  | < 0.001  |
|               | One random observation per study | 109      | 0.1663                        | 0.0832  | 0.2493  | < 0.001  |
| Shoot biomass | Complete dataset                 | 533      | 0.0960                        | 0.0583  | 0.1336  | < 0.001  |
|               | One random observation per study | 52       | 0.1582                        | 0.0206  | 0.2957  | < 0.05   |
| SNUE          | Complete dataset                 | 107      | -0.0682                       | -0.0906 | -0.0459 | < 0.001  |
|               | One random observation per study | 17       | -0.0925                       | -0.1630 | -0.0220 | < 0.05   |
| NUpE          | Complete dataset                 | 193      | 0.1510                        | 0.1139  | 0.1882  | < 0.001  |
|               | One random observation per study | 23       | 0.2430                        | 0.1133  | 0.3727  | < 0.001  |
| YNUE          | Complete dataset                 | 53       | -0.0517                       | -0.0890 | -0.0143 | < 0.01   |
|               | One random observation per study | 11       | -0.0878                       | -0.1655 | -0.01   | < 0.05   |
| PFPN          | Complete dataset                 | 268      | 0.0905                        | 0.0632  | 0.1179  | < 0.001  |
|               | One random observation per study | 29       | 0.1035                        | 0.0293  | 0.1776  | < 0.01   |
