# Supplementary material for: Genetically modified crops are superior in their nitrogen use efficiency-A meta-analysis of three major cereals
Source: PubMed Central journal article supplement (PMC7244766; doi:10.1038/s41598-020-65684-9), 2020-05-22

## **Genetically modified crops are superior in their nitrogen use efficiency-A meta-analysis of three major cereals**

Mengjiao Li <sup>1</sup>, Jili Xu <sup>1</sup>, Zhiyuan Gao <sup>1</sup>, Hui Tian <sup>1,\*</sup>, Yajun Gao <sup>1,\*</sup> & Khalil Kariman<sup>2</sup>

<sup>1</sup> Key Laboratory of Plant Nutrition and Agri-environment in Northwest China, Ministry of Agriculture, College of Natural Resources and Environment, Northwest A&F University, Yangling, Shaanxi, China

<sup>2</sup> School of Agriculture and Environment, The University of Western Australia, Crawley, WA 6009, Australia

Corresponding authors:

1. Hui Tian, tianh@nwsuaf.edu.cn
2. Yajun Gao, yajungao@nwafu.edu.cn

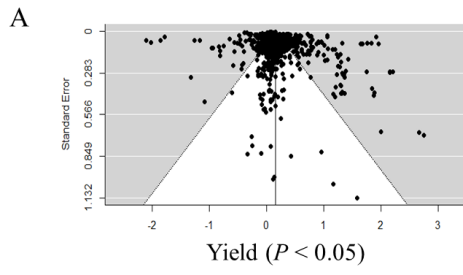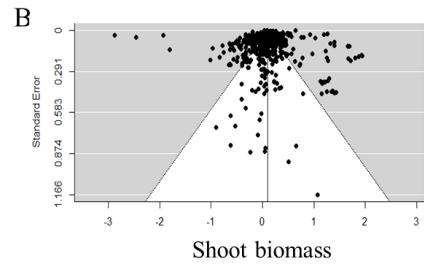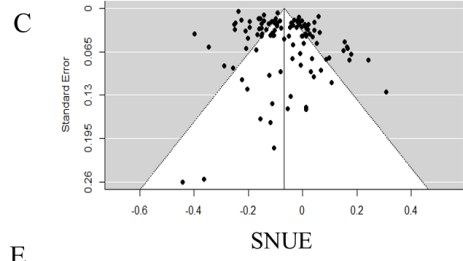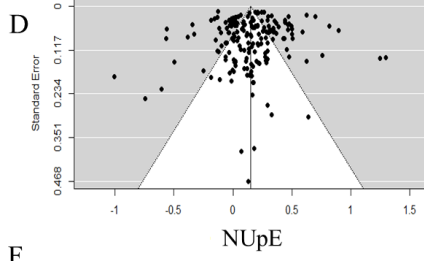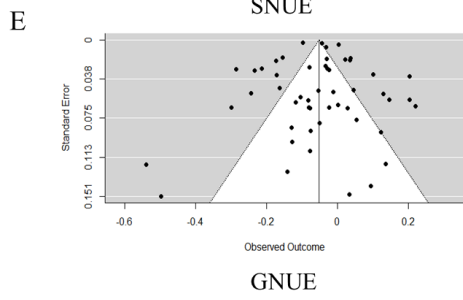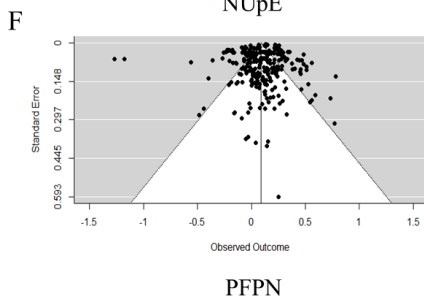

Supplement: 41598_2020_65684_MOESM6_ESM.pdf [file 41598_2020_65684_MOESM6_ESM.pdf]
